# Supplementary material for: Gene Model Related to m6A Predicts the Prognostic Effect of Immune Infiltration on Head and Neck Squamous Cell Carcinoma
Source: J Oncol. 2021 Aug 20;2021:1814266. doi: 10.1155/2021/1814266 (PMC8397575; doi:10.1155/2021/1814266)
Supplement: Supplementary Materials — Figure S1: the survival analysis of AC008115.3, BTG3-AS1, AC024060.2, AC099850.3, AL139289.2, AL117327.1, BCDIN3D-AS1, and AL590428.1. Figure S2: the correlation between risk score and 6 classical immune checkpoints (HLA-C, CD276, CD40LG, CD27, CD28, and SELP). Table S1: the TCGA dataset is downloaded from UCSC Xena. [file 1814266.f1.zip]

Archive with 3 entries (3 files):
- 1814266.f1/Figure S1.ai
- 1814266.f1/Figure S2.eps
- 1814266.f1/table S1 (1).docx
